# Supplementary material for: 24-Epibrassinolide confers zinc stress tolerance in watermelon seedlings through modulating antioxidative capacities and lignin accumulation
Source: PeerJ. 2023 May 9;11:e15330. doi: 10.7717/peerj.15330 (PMC10178286; doi:10.7717/peerj.15330)
Supplement: Supplemental Information 3 [file peerj-11-15330-s003.xlsx]

## Sheet: Table 1
Shoot fresh weight (g)										Root fresh weight (g)
	Control	Zn	0.025uM	0.05uM	0.1uM	0.2uM	0.4uM				Control	Zn	0.025uM	0.05uM	0.1uM	0.2uM	0.4uM
I	5.18	4.15	4.77	4.77	4.21	4.37	3.86			I	1.69	0.92	1.02	1.31	1.07	0.88	0.71
II	6.12	4.15	5.17	4.98	4.46	4.17	3.79			II	1.91	0.98	1.2	1.25	0.95	0.81	0.69
III	5.26	4.65	4.93	5.06	4.07	3.78	3.51			III	1.69	1.02	1.01	1.26	1.01	0.82	0.73
note:										note:
I,II,III: Three biological repeats										I,II,III: Three biological repeats

## Sheet: Figure 1
Chlorophyll a content								Chlorophyll b content								Chlorophyll a+b content
		Control	0.05uM EBR	Zn	Zn+0.05uM EBR					Control	0.05uM EBR	Zn	Zn+0.05uM EBR					Control	0.05uM EBR	Zn	Zn+0.05uM EBR
	I	0.3	0.31	0.17	0.2				I	0.11	0.12	0.08	0.095				I	0.41	0.43	0.25	0.295
	II	0.26	0.32	0.18	0.23				II	0.1	0.12	0.09	0.1				II	0.36	0.44	0.27	0.33
	III	0.33	0.29	0.16	0.22				III	0.12	0.11	0.08	0.105				III	0.45	0.4	0.24	0.325
note:								note:								note:
I,II,III: Three biological repeats								I,II,III: Three biological repeats								I,II,III: Three biological repeats

## Sheet: Figure 2
	H2O2 content									MDA content
			Control	0.05uM EBR	Zn	Zn+0.05uM EBR						Control	0.05uM EBR	Zn	Zn+0.05uM EBR
		I	15.55	12.73	43.05	30.68					I	0.17	0.13	0.3	0.22
		II	13.37	13.95	45.15	35.58					II	0.18	0.15	0.32	0.23
		III	14.52	11.86	48.95	28.73					III	0.13	0.13	0.28	0.25
note:										note:
I,II,III: Three biological repeats										I,II,III: Three biological repeats

## Sheet: Figure 3
SOD activity							POD activity							CAT activity							APX activity
		Control	0.05uM EBR	Zn	Zn+0.05uM EBR				Control	0.05uM EBR	Zn	Zn+0.05uM EBR				Control	0.05uM EBR	Zn	Zn+0.05uM EBR				Control	0.05uM EBR	Zn	Zn+0.05uM EBR		GR		Control	0.05uM EBR	Zn	Zn+0.05uM EBR
	I	16.4817	13.191	9.16718	9.38783			I	7.20697	7.4881	3.93303	5.61027			I	0.660814	0.648619	0.233025	0.404629			I	0.374827	0.388131	0.176641	0.2061			I	0.0959127	0.127995	0.089051	0.0996319
	II	13.7302	15.9109	8.43712	11.2357			II	6.54158	5.78824	3.59431	4.6298			II	0.606663	0.685884	0.325376	0.379575			II	0.386124	0.428939	0.145346	0.210114			II	0.112958	0.148884	0.0586201	0.100898
	III	13.8082	14.7681	8.13574	10.9397			III	5.42998	6.59922	3.17075	5.51578			III	0.58519	0.788289	0.29887	0.390617			III	0.398401	0.452614	0.179148	0.216411			III	0.0945711	0.155557	0.0632554	0.092679
note:							note:							note:							note:
I,II,III: Three biological repeats							I,II,III: Three biological repeats							I,II,III: Three biological repeats							I,II,III: Three biological repeats

## Sheet: Figure 4
	AsA content									GSH content
			Control	0.05uM EBR	Zn	Zn+0.05uM EBR						Control	0.05uM EBR	Zn	Zn+0.05uM EBR
		I	0.778447	0.65201	0.387539	0.561087					I	5.70347	6.04961	2.15309	3.36173
		II	0.633822	0.744011	0.400404	0.510766					II	7.16714	6.18915	2.08354	3.23685
		III	0.575477	0.674959	0.44214	0.508035					III	5.43195	6.64479	2.07332	4.0112
	note:									note:
	I,II,III: Three biological repeats									I,II,III: Three biological repeats

## Sheet: Figure 5
SOD expression								CAT expression							APX expression								GR expression
		Control	0.05uM EBR	Zn	Zn+0.05uM EBR					Control	0.05uM EBR	Zn	Zn+0.05uM EBR				Control	0.05uM EBR	Zn	Zn+0.05uM EBR					Control	0.05uM EBR	Zn	Zn+0.05uM EBR
	I	1.01	1.07	0.61	0.77				I	1.08	1.07	0.46	0.78			I	1.02	1.07	0.36	0.69				I	1.08	1.21	0.49	0.89
	II	0.97	1.17	0.55	0.67				II	1.02	1.14	0.49	0.82			II	1.12	1.11	0.34	0.77				II	1.04	1.28	0.42	0.92
	III	1.09	1.02	0.59	0.89				III	1.06	1.05	0.52	0.77			III	1.07	1.09	0.38	0.6				III	1.11	1.19	0.5	0.79
note:								note:							note:
I,II,III: Three biological repeats								I,II,III: Three biological repeats							I,II,III: Three biological repeats

## Sheet: Figure 6
Zn content							Lignin content							PAL activity							C4L activity
		Control	0.05uM EBR	Zn	Zn+0.05uM EBR				Control	0.05uM EBR	Zn	Zn+0.05uM EBR				Control	0.05uM EBR	Zn	Zn+0.05uM EBR				Control	0.05uM EBR	Zn	Zn+0.05uM EBR
	I	45.34	44.57	524.27	474.58			I	14.96	15.71	10.93	14.81			I	2.27	2.34	1.58	2.11			I	12.62	13.88	9.02	10.42
	II	53.29	38.76	579.68	401.43			II	15.07	16.26	10.21	12.93			II	2.52	2.72	1.47	2.07			II	14.12	14.77	7.81	9.97
	III	40.26	57.13	690.65	324.95			III	16.54	17.56	9.55	11.93			III	2.45	2.13	1.61	1.92			III	14.26	12.56	8.55	10.24
note:							note:							note:							note:
I,II,III: Three biological repeats							I,II,III: Three biological repeats							I,II,III: Three biological repeats							I,II,III: Three biological repeats
